# Supplementary material for: Magnetically targeted erythrocyte membrane coated nanosystem for synergistic photothermal/chemotherapy of cancer
Source: Royal Society of Chemistry journal article supplement (doi:10.1039/d0tb00364f), 2020-01-01
Supplement: d0tb00364f1.pdf [file d0tb00364f1.pdf]

## Supporting information

### **Magnetically Targeted Erythrocyte Membrane Coated Nanoparticles for Synergistic Photothermal-/chemotherapy of Cancer**

Long Wang,<sup>b, c</sup> Sijie Chen,<sup>a</sup> Wenjing Pei,<sup>a</sup> Biying Huang,<sup>a</sup> and Chengcheng Niu <sup>\*, a, b</sup>

<sup>a</sup> Department of Ultrasound Diagnosis, The Second Xiangya Hospital, Central South University,  
Changsha, Hunan 410011, China

<sup>b</sup> Research Center of Ultrasonography, The Second Xiangya Hospital, Central South University,  
Changsha, Hunan 410011, China

<sup>c</sup> Department of Orthopedics, Xiangya Hospital, Central South University, Changsha, Hunan  
410008, China

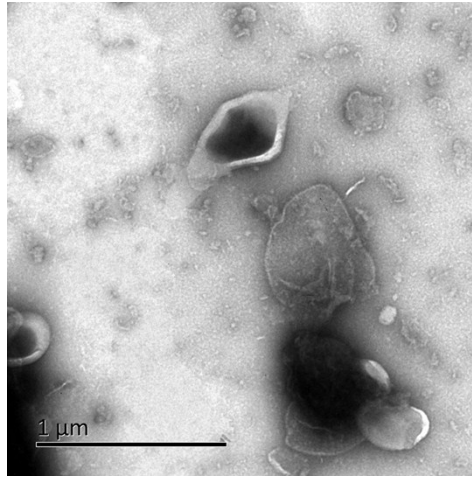

Figure S1. TEM image of RBC vesicles.

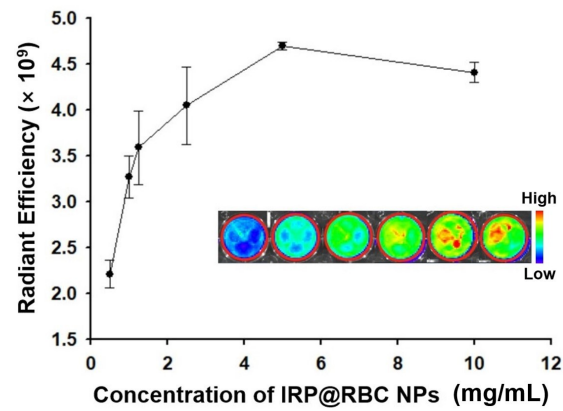

Figure S2. Fluorescence intensities and images with different concentration of IRP@RBC NPs.

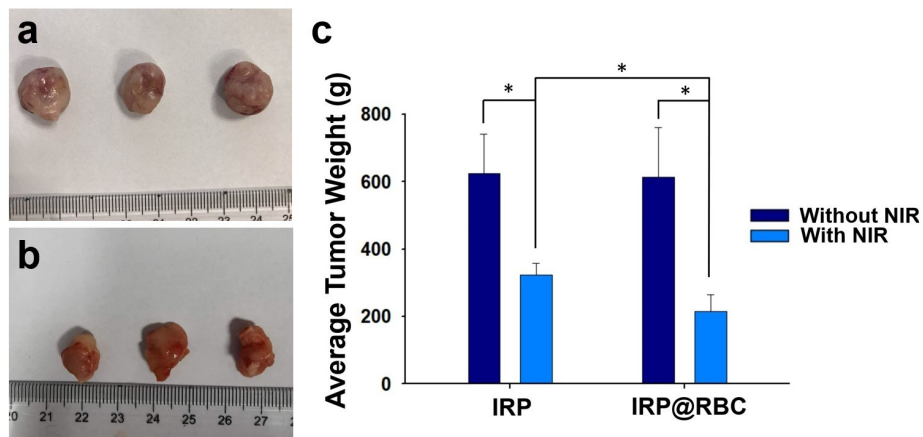

Figure S3. In vivo antitumor therapy. Photographs of tumors after different treatments: (a) IRP; (b) IRP with NIR (808 nm, 1 W/cm<sup>2</sup>, 5 min). (c) Tumor growth curve after different treatments (\* $p < 0.05$ ).

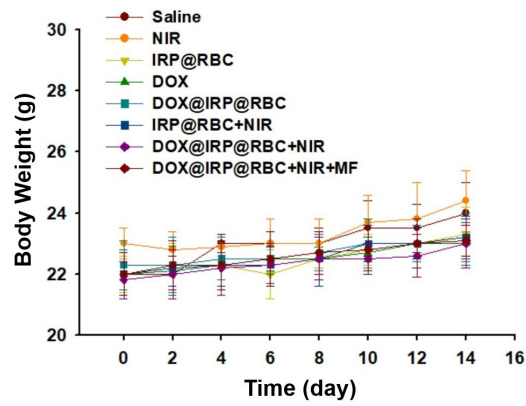

Figure S4. Body weight changes of mice during different treatments: (1) saline; (2) NIR; (3) IRP@RBC; (4) DOX; (5) DOX@IRP@RBC; (6) IRP@RBC with NIR; (7) DOX@IRP@RBC with NIR; (8) DOX@IRP@RBC with NIR and MF.

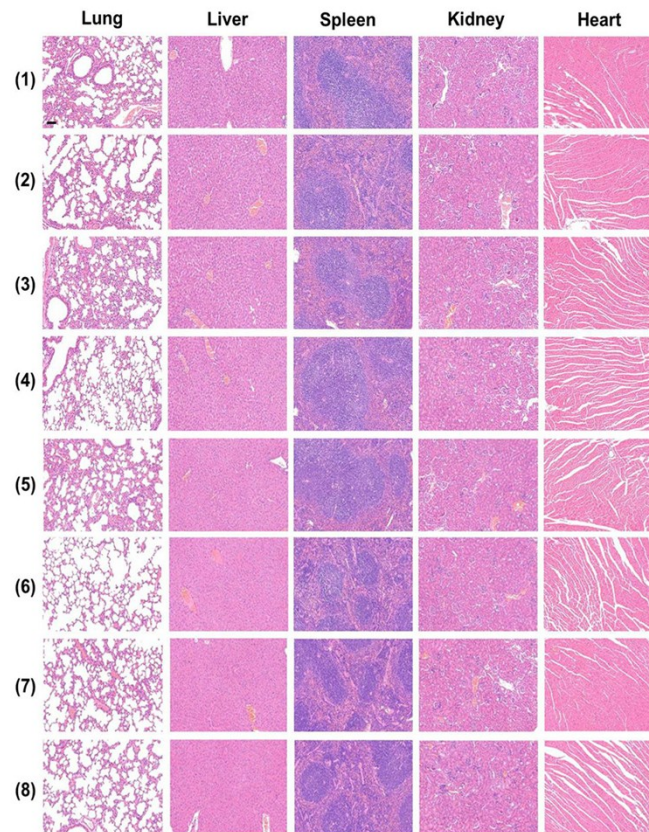

Figure S5. H&E staining of lung, liver, spleen, kidney, and heart tissue slices after different treatments: (1) saline; (2) NIR; (3) IRP@RBC; (4) DOX; (5) DOX@IRP@RBC; (6) IRP@RBC with NIR; (7) DOX@IRP@RBC with NIR; (8) DOX@IRP@RBC with NIR and MF, scale bar = 50  $\mu$ m.
